# Supplementary material for: APP modulates KCC2 expression and function in hippocampal GABAergic inhibition
Source: eLife. 2017 Jan 5;6:e20142. doi: 10.7554/eLife.20142 (PMC5224924; doi:10.7554/eLife.20142)
Supplement: Figure 2—source data 1. — DOI: http://dx.doi.org/10.7554/eLife.20142.006 [file elife-20142-fig2-data1.xls]

## Sheet: Fig 2I
Relative GABAAR-alpha1 levels				mean	SEM	P value
WT	1.20939	0.815974	0.974637	1	0.11428	0.04
APP-/-	0.733954	0.252848	0.274424	0.42041	0.1569
Relative GABAAR-alpha5 levels				mean	SEM	P value
WT	0.891727	0.820068	1.28821	1	0.14558	0.9
APP-/-	0.851309	1.33935	0.900533	1.0304	0.15513
Relative GABAAR-beta2 levels				mean	SEM	P value
WT	0.748683	1.52944	0.721879	1	0.26483	0.7
APP-/-	1.0269	1.08595	0.500375	0.87108	0.18613
Relative GABAAR-gamma2 levels				mean	SEM	P value
WT	0.627213	1.423	0.949788	1	0.23109	0.5
APP-/-	1.5836	1.28741	0.794402	1.2218	0.23017
Relative GABAAR-delta levels				mean	SEM	P value
WT	1.10301	1.05141	0.845573	1	0.07864	0.7
APP-/-	1.23386	0.790595	0.780368	0.93494	0.14949

## Sheet: Fig 2-fig supplement 1B
Relative GAD67+/GFP cells				mean	SEM	p value
WT	1.16667	0.83333	1	1	0.09623	0.6
APP-/-	1.5	1	0.83333	1.11111	0.20031

## Sheet: Fig 2-fig supplement 2B
mEPSC amplitude										mean	SEM	p value
WT	14.302	11.902	14.893	13.835	12.004	12.73	13.369			13.2907	0.4307	0.5
APP-/-	16.554	14.625	11.267	10.885	12.533	11.299	9.048	14.14	13.428	12.6421	0.76201
mEPSC frequency
WT	0.128	0.134	0.056	0.206	0.321	0.039	0.344			0.17543	0.04561	0.3
APP-/-	0.184	0.231	1.272	0.026	1.126	0.137	0.119	0.122	0.021	0.35978	0.1606

## Sheet: Fig 2-fig supplement 2D
Relative GluR1 levels				mean	SEM	p value
WT	0.705181	1.27052	1.0243	1	0.16365	0.4
APP-/-	1.10703	1.08159	1.28519	1.15793	0.06405
Relative GluR2 levels				mean	SEM	p value
WT	1.23415	0.833192	0.932654	1	0.12055	0.9
APP-/-	1.61993	0.882158	0.584446	1.02884	0.30778
