# Supplementary material for: APP modulates KCC2 expression and function in hippocampal GABAergic inhibition
Source: eLife. 2017 Jan 5;6:e20142. doi: 10.7554/eLife.20142 (PMC5224924; doi:10.7554/eLife.20142)
Supplement: Figure 3—source data 1. — DOI: http://dx.doi.org/10.7554/eLife.20142.010 [file elife-20142-fig3-data1.xls]

## Sheet: Fig 3B
Relative protein levels
surface KCC2				mean	SEM	P value
WT	0.843775	1.08969	1.06654	1	0.0784	0.02
APP-/-	0.333792	0.572319	0.693733	0.53328	0.10572
total KCC2
WT	0.859937	1.11542	1.02464	1	0.07477	0.01
APP-/-	0.617523	0.686056	0.675457	0.65968	0.0213
NKCC1
WT	0.977281	1.01106	1.01166	1	0.01136	0.2
APP-/-	1.01907	1.05007	1.17413	1.08109	0.04737

## Sheet: Fig 3D
Relative protein levels
surface KCC2				mean	SEM	P value
KCC2+hAPP695	1.06859	0.959696	0.971711	1	0.03447	0.001
KCC2+pcDNA3	0.352567	0.545418	0.342074	0.41335	0.0661
total KCC2
KCC2+hAPP695	0.920737	1.19828	0.880979	1	0.0998	0.04
KCC2+pcDNA3	0.612037	0.750383	0.447997	0.60347	0.0874

## Sheet: Fig 3F
Relative mRNA levels
APP				mean	SEM	P value
WT	0.82	1.16	1.02	1	0.09866	0.0008
APP-/-	0.13	0.1	0.09	0.10667	0.01202
KCC2
WT	0.96	1.18	0.86	1	0.09452	0.5
APP-/-	0.91	1.22	1.13	1.08667	0.09207

## Sheet: Fig 3H
Relative KCC2 levels				mean	SEM	P value
KCC2+PCDNA3	0.772072	1.21696	1.01096	1	0.12855	0.004
KCC2+hAPP695	2.4824	1.94403	2.26255	2.22966	0.15628
KCC2+C99	1.01962	1.00058	1.21523	1.07848	0.0686	0.003
KCC2+sAPPb	1.04385	1.51991	1.57184	1.37853	0.16801	0.02

## Sheet: Fig 3J
Relative KCC2 levels				mean	SEM	P value
WT	1.35032	0.834704	0.814971	1	0.17525	0.04
sAPPbKi	0.62185	0.196863	0.18178	0.3335	0.14424
