# Supplementary material for: APP modulates KCC2 expression and function in hippocampal GABAergic inhibition
Source: eLife. 2017 Jan 5;6:e20142. doi: 10.7554/eLife.20142 (PMC5224924; doi:10.7554/eLife.20142)
Supplement: Figure 4—source data 1. — DOI: http://dx.doi.org/10.7554/eLife.20142.012 [file elife-20142-fig4-data1.xls]

## Sheet: Fig 4G
Relative KCC2 levels				mean	SEM	p value
KCC2+Veh	0.75484	0.8268	1.41836	1	0.21021	0.02
KCC2+PP2	1.74493	2.07634	2.21195	2.01107	0.13871
