# Supplementary material for: APP modulates KCC2 expression and function in hippocampal GABAergic inhibition
Source: eLife. 2017 Jan 5;6:e20142. doi: 10.7554/eLife.20142 (PMC5224924; doi:10.7554/eLife.20142)
Supplement: Figure 5—source data 1. — DOI: http://dx.doi.org/10.7554/eLife.20142.015 [file elife-20142-fig5-data1.xls]

## Sheet: Fig 5B
EGABA (mV)						mean	SEM	p value
APP-/-+Veh	-62.2	-55.1	-48.4	-49.9	-53.6	-53.84	-2.41508	0.02
APP-/-+CLP257	-75.8	-69.3	-60.1	-59.4	-63.3	-65.58	-3.09603

## Sheet: Fig 5D
Relative KCC2 levels				mean	SEM	p value
APP-/-+Veh	0.82143	1.03571	1.14286	1	0.09449	0.02
APP-/-+CLP290	1.67411	2.30357	2.88393	2.2872	0.34934

## Sheet: Fig 5F
Relative protein levels
surface KCC2				mean	SEM	p value
KCC2+Veh	0.70812	0.81195	1.47994	1	0.24183	0.03
KCC2+CLP257	1.95654	2.65245	1.83258	2.14719	0.25515
total KCC2
KCC2+Veh	1.19195	0.92121	0.88684	1	0.09649	0.3
KCC2+CLP257	1.00003	0.72524	0.83271	0.85266	0.07995

## Sheet: Fig 5J
Relative GABAAR levels					mean	SEM	p value
APP-/-+Veh	1.08499	1.06204	0.98194	0.87102	1	0.04833	1e-05
APP-/-+CLP290	2.36465	2.61034	2.43587	2.844	2.56371	0.10673
