# Supplementary material for: APP modulates KCC2 expression and function in hippocampal GABAergic inhibition
Source: eLife. 2017 Jan 5;6:e20142. doi: 10.7554/eLife.20142 (PMC5224924; doi:10.7554/eLife.20142)
Supplement: Figure 6—source data 1. — DOI: http://dx.doi.org/10.7554/eLife.20142.017 [file elife-20142-fig6-data1.xls]

## Sheet: Fig 6B
Relative GABAAR-alpha1 levels						mean	SEM	p value
alpha1+pcDNA3	1.23923	0.96817	1.4665	0.61494	0.71117	1	0.1593	0.003
alpha1+KCC2	1.92722	2.22353	1.59502	1.64579	2.53437	1.98519	0.17737
Relative GABAAR-beta2 levels				mean	SEM	p value
beta2+pcDNA3	1.59212	0.70193	0.70595	1	0.29606	0.9
beta2+KCC2	1.71478	0.846641	0.620371	1.0606	0.33355

## Sheet: Fig 6E
Relative PLIC-1 levels				mean	SEM	P value
WT	1.17028	1.01264	0.817079	1	0.10216	0.8
APP-/-	1.34708	1.26863	0.555492	1.05707	0.25181

## Sheet: Fig 6H
WT hippocampus								APP-/- hippocampus
Relative GluR1 levels				mean	SEM	p value		Relative GluR1 levels				mean	SEM	p value
Veh	0.884483	1.26466	0.850862	1	0.13268	0.4		Veh	0.955206	1.11819	0.926607	1	0.05967	0.9
VU02450551	0.956034	0.887069	0.676724	0.83994	0.084			VU02450551	1.40235	1.18345	0.558543	1.04811	0.25281
Relative GluR2 levels				mean	SEM	p value		Relative GABAAR-alpha1 levels				mean	SEM	p value
Veh	0.898162	1.10913	0.992705	1	0.06101	0.2		Veh	0.815995	0.974966	1.20904	1	0.11415	0.048
VU02450551	0.97082	0.900788	0.73096	0.86752	0.07121			VU02450551	0.770856	0.435338	0.349972	0.51872	0.12845
Relative GABAAR-alpha1 levels				mean	SEM	p value
Veh	0.8574	0.95336	1.18924	1	0.09859	0.009
VU02450551	0.44481	0.48503	0.56164	0.49716	0.03427
Relative GABAAR-alpha5 levels				mean	SEM	p value
Veh	0.872958	0.903811	1.22323	1	0.11197	0.4
VU02450551	0.932849	1.00635	0.582577	0.84059	0.13074
Relative GABAAR-beta2 levels				mean	SEM	p value
Veh	1.19377	1.06574	0.740484	1	0.13492	0.1
VU02450551	0.788927	0.750865	0.695502	0.7451	0.02712
Relative GABAAR-gamma2 levels				mean	SEM	p value
Veh	1.10659	0.711377	1.18204	1	0.14595	0.5
VU02450551	1.07066	0.761677	0.711377	0.8479	0.11232

## Sheet: Fig 6J
Relative KCC2 levels				mean	SEM	P value
P7	1.07911	1.05099	0.869903	1	0.06555	0.001
P35	2.66514	2.67855	2.13276	2.49215	0.17974
Relative GABAAR-alpha1 levels				mean	SEM	P value
P7	1.07952	0.9736	0.946879	1	0.0405	0.0004
P35	6.97294	6.80072	8.6556	7.47642	0.59168
