# Supplementary material for: APP modulates KCC2 expression and function in hippocampal GABAergic inhibition
Source: eLife. 2017 Jan 5;6:e20142. doi: 10.7554/eLife.20142 (PMC5224924; doi:10.7554/eLife.20142)
Supplement: Figure 7—source data 1. — DOI: http://dx.doi.org/10.7554/eLife.20142.020 [file elife-20142-fig7-data1.xls]

## Sheet: Fig 7B
Relative mKCC2 levels				mean	SEM	p value
mKCC2+pcDNA3	0.7884	0.5409	1.6707	1	0.34288	0.0001
mKCC2+APP	6.6505	6.22934	6.50879	6.46288	0.12372

## Sheet: Fig 7D
Relative mKCC2 levels				mean	SEM	p value
mKCC2+Veh	0.98177	1.25648	0.76175	1	0.14311	0.4
mKCC2+PP2	1.54725	0.90385	1.21812	1.22308	0.18575

## Sheet: Fig 7H
Relative mKCC2 levels				mean	SEM	p value
mKCC2+pcDNA3	1.61484	0.47028	0.91488	1	0.33313
mKCC2+hAPP695	5.83596	4.59751	3.56607	4.66651	0.65617	0.008
mKCC2+CYLD	5.30436	5.00604	5.6727	5.3277	0.1928	0.0004
