# Supplementary material for: APP modulates KCC2 expression and function in hippocampal GABAergic inhibition
Source: eLife. 2017 Jan 5;6:e20142. doi: 10.7554/eLife.20142 (PMC5224924; doi:10.7554/eLife.20142)
Supplement: Figure 8—source data 1. — DOI: http://dx.doi.org/10.7554/eLife.20142.022 [file elife-20142-fig8-data1.xls]

## Sheet: Fig 8B
mKCC2
Relative mKCC2 levels				mean	SEM	p value
Veh	0.871202	0.71807	1.41073	1	0.21007	0.03
MG132	1.79211	2.40272	1.75437	1.98307	0.21011
mKCC2+hAPP695
Relative mKCC2 levels				mean	SEM	p value
Veh	0.854805	1.04322	1.10198	1	0.07455	0.3
MG132	1.2093	1.47628	0.972993	1.21953	0.14538

## Sheet: Fig 8D
Relative total KCC2 levels				mean	SEM	p value
KCC2+Veh	1.20083	0.565919	1.23325	1	0.21724
KCC2+MG132	3.38073	1.9007	2.93494	2.73879	0.43836	0.02
KCC2+hAPP695	3.29191	5.67141	3.50013	4.15448	0.76084	0.02

## Sheet: Fig 8H
Relative total KCC2 levels				mean	SEM	p value
Veh	0.93258	1.28726	0.780156	1	0.15022	0.0005
MG132	4.97948	4.51315	3.94777	4.48013	0.29829

## Sheet: Fig 8J
HEK293-transfect KCC2
Relative surface KCC2 levels				mean	SEM	p value
Veh	1.20885	0.830417	0.960738	1	0.11099	0.03
MG132	3.28193	2.26999	1.88234	2.47809	0.41721
APP-/- Hippocampus
Relative surface KCC2 levels				mean	SEM	p value
Veh	0.58633	0.4317	1.98196	1	0.49301	0.03
MG132	3.11607	2.39534	3.10329	2.87157	0.23814
