# Supplementary material for: APP modulates KCC2 expression and function in hippocampal GABAergic inhibition
Source: eLife. 2017 Jan 5;6:e20142. doi: 10.7554/eLife.20142 (PMC5224924; doi:10.7554/eLife.20142)
Supplement: Figure 9—source data 1. — DOI: http://dx.doi.org/10.7554/eLife.20142.024 [file elife-20142-fig9-data1.xls]

## Sheet: Fig 9B
Tonic GABA Current											Mean	SEM	p value
WT	26.2	16.5	18.3	16.5	10.4	36.6	16.5	22.6	22	5.5	19.11	2.7
APP-/-	9.2	8.5	6.7	11	11	8.5	11	7.3	12.2	5.5	9.09	0.7	0.002
APP-/-+CLP257	15.3	18.3	7.3	13.4	18.9	5.5	9.8	11	7.9		11.9	1.6	0.04
